# Supplementary material for: Whole-Genome Sequencing in a Patient with Charcot–Marie–Tooth Neuropathy
Source: Atypon-hosted journal article supplement (doi:10.1056/nejmoa0908094), 2010-03-10
Supplement: nejm_lupski_1181sa1.pdf [file nejm_lupski_1181sa1.pdf]

## Supplementary Appendix

This appendix has been provided by the authors to give readers additional information about their work.

Supplement to: Lupski JR, Reid JG, Gonzaga-Jauregui C, et al. Whole-genome sequencing in a patient with Charcot–Marie–Tooth neuropathy. *N Engl J Med* 2010;362:1181-91. DOI: 10.1056/NEJMoa0908094.

Supplementary Appendix to:

## **Whole-Genome Sequencing and *SH3TC2* Mutations Causing Charcot-Marie-Tooth Neuropathy**

James R. Lupski, M.D., Ph.D., Jeffrey G. Reid, Ph.D., Claudia Gonzaga-Jauregui, B.S., David Rio Deiros, B.S., David C.Y. Chen, M.Sc., Lynne Nazareth, Ph.D., Matthew Bainbridge, M.Sc., Huyen Dinh, B.S., Chyn Jing, M.Sc., David A. Wheeler, Ph.D., Amy L. McGuire, J.D., Ph.D., Feng Zhang, Ph.D., Pawel Stankiewicz, M.D., Ph.D., John J. Halperin, M.D., Chengyong Yang, Ph.D., Curtis Gehman, Ph.D., Danwei Guo, M.Sc., Rola K. Irikat, B.S., Warren Tom, B.S., Nick J. Fantin, B.S., Donna M. Muzny, M.Sc., Richard A. Gibbs, Ph.D.

From the Department of Molecular and Human Genetics (J.R.L., J.G.R., C.G.-J., M.B., F.Z., P.S., D.M.M., R.A.G), Human Genome Sequencing Center (J.G.R, D.R.D., D.C.Y.C., L.N., M.B., H.D., C. J., D.A.W., D.M.M., R.A.G), Center for Medical Ethics and Health Policy (A.L.M.), Department of Pediatrics (J.R.L.), and Texas Children's Hospital (J.R.L.), Baylor College of Medicine, Houston; Atlantic Neuroscience Institute, Summit, New Jersey and Mount Sinai School of Medicine, New York (J.J.H.); Life Technologies, Carlsbad (C.Y., C.G., D.G., R.K.I., W.T., N.J.F)

Address reprint requests to Dr. Richard Gibbs at One Baylor Plaza, Mail Stop BCM226, Houston, TX, 77030, or [agibbs@bcm.edu](mailto:agibbs@bcm.edu).

### **Supplementary Material Contents:**

1. Supplementary Methods,
2. Supplementary Figure 1. Raw read coverage at key SNP positions.
3. Supplementary Table 1. CNVs found in neuropathy subject's genome
4. Supplementary Table 2. nsSNPs cross-referenced to the Human Gene Mutation Database
5. Supplementary Table 3. Neuropathy associated genes.

## 1. Supplementary Methods

The Applied Biosystems SOLiD™ System DNA sequencing platform was employed to sequence genomic DNA, according to manufacturer's specifications. Primary sequence analysis consisting of image analysis and base-calling was performed using the standard SOLiD primary analysis pipeline for the 35bp fragment and 25x25bp mate-pair data, mapping and variant calling analysis was with the AB-provided offline analysis suite "corona\_lite". For the 50 x 50 mate-pair data the Applied Biosystems Hidra pipeline was employed.

Mapping parameters for the 35 bp reads allowed for up to 2 mismatches in 25bp, and 3 mismatches in 35bp. The mapping did not allow for insertions or deletions. Variant calls were generated in a high sensitivity/low stringency mode where no coverage cut-offs were imposed for variant calls. Also, multi-allelic sites are rejected as sequencing noise, or mismapping. In making SNP calls, multiple reads with the same start point and direction are treated as a single read to avoid errors from oversampling of duplicate read alleles.

To maximize the sequence yield of the 50x50bp mate-pair data mapping was performed in 28 different iterations with reads trimmed back to progressively shorter lengths (in 5bp increments from 50bp down to 25bp) and lower stringency (from 0 to 4 mismatches)("progressive mapping"). For any given read the longest mapping with the highest stringency (longest length, fewest mismatches) was kept as the best alignment. Mapping was carried out with mapreads (the mapping tool provided by the vendor as part of their "corona\_lite" analysis suite) in parallel for the different iterations and read data was merged at the end.

CNV analysis was performed with the AB single-sample CNV tool that uses read coverage corrected for mapping and amplification efficiency to identify regions likely to have increased or decreased copy number variation. Analysis of the high-density random array data used custom tools developed by Applied Biosystems and included modified bead-finding and progressive mapping using "corona\_lite". Only publicly available ([www.solidsoftwaretools.com](http://www.solidsoftwaretools.com)) vendor software was used for the sequence data analysis presented in this study.

Supplementary Figure 1

A

G<sup>2</sup>3112 32 31302030230100112  
A<sup>3</sup>112 10 313020302301001123  
T<sup>2</sup> 32 313020302301001123103  
T<sup>0</sup>22223332320200123123131002113312031222003223112 32 31302030230100112310313013002133011002202030131  
TTCTCTATAGCTTCCCAGCAGCATGGGACATACTTACTCTTTAGATGTCGATGCCTTAAGCCAAACAGCAATGCCATTTTCATAACAAAGAAGGCCATG  
AAGAGATATCGAAGGGTCGTCGTACCCTGTATGAATGAGAAATCTACAGCTACGGAATTCGGTTTGTCTGTTACGGTAAAGTATTGTTTCTCCGGTAC  
022223332320200123123131002113312031222003223112 32 31302030230100112310313013002133011002202030131<sup>C</sup>  
13312031222003223112 32 313020302301<sup>T</sup>  
003223112 32 3130203023010<sup>T</sup>

B

C<sup>2</sup>2223332320200123123131002113312031222003223112 10 3  
C<sup>2</sup>020012312313100211331203222003223112 00 313020302  
C<sup>0</sup>112312313100211331203222003223112 32 313020122301  
C<sup>0</sup>123123131002113312031222003223112 10 3130203023010  
G<sup>3</sup>131002113312031222003223112 10 31302030230102.....  
C<sup>1</sup>31002113312031222003223112 10 31302030230100112310  
C<sup>1</sup>3312031222003223112 10 31  
C<sup>1</sup>3312031222003223112 10 313020302301001123103130130  
C<sup>1</sup>3312031222003223112 10 31302030212100112.....  
C<sup>1</sup>3312031222003223112 10 313020302301001123103130130  
G<sup>2</sup>3112 32 31302030230100112  
G<sup>2</sup>3112 32 31302030230100112  
A<sup>3</sup>112 10 313020302301001123  
A<sup>3</sup>112 32 313020302301001123  
T<sup>2</sup> 32 313020302301001123103  
T<sup>2</sup>313020302301001123103130130021330110022020301...  
T<sup>0</sup>22223332320200123123131002113312031222003223112 32 31302030230100112310313013002133011002202030131  
TTCTCTATAGCTTCCCAGCAGCATGGGACATACTTACTCTTTAGATGTCGATGCCTTAAGCCAAACAGCAATGCCATTTTCATAACAAAGAAGGCCATG  
AAGAGATATCGAAGGGTCGTCGTACCCTGTATGAATGAGAAATCTACAGCTACGGAATTCGGTTTGTCTGTTACGGTAAAGTATTGTTTCTCCGGTAC  
022223332320200123123131002113312031222003223112 32 31302030230100112310313013002133011002202030131<sup>C</sup>  
.....123123101002113310031222003223112 1<sup>T</sup>  
22223332320200123123131002123312031222003223112 32<sup>T</sup>  
2320200123123131002113312031222003223112 32 3130203<sup>T</sup>  
20200123123131002113312031222003223112 10 313020302<sup>C</sup>  
123123131002113312031222003223112 32 31302030230100<sup>T</sup>  
131002113312031222003223112 10 31302030230100112310<sup>T</sup>  
31002113312031222003223112 10 313020302301001123103<sup>A</sup>  
31002113312031222003223112 10 313020302301001123103<sup>A</sup>  
31012113312031222003223112 32 313020302301001023203<sup>A</sup>  
11002113312031222003223112 32 313020302301001123103<sup>A</sup>  
31002113312031222003223112 32 313020302301001123103<sup>A</sup>  
1002113312031222003223112 10 3130203023010011231031<sup>C</sup>  
02113312031222003223112 1<sup>T</sup>  
113312031222003223112 32 3<sup>A</sup>  
13312031222003223112 32 313020302301<sup>T</sup>  
2031222003223112 32 3130003023010001231031301300213<sup>A</sup>  
31222003223112 10 313020302301001123103130130021330<sup>T</sup>  
1222003223112 10 313020302<sup>C</sup>  
003223112 32 3130203023010<sup>T</sup>  
3223112 20 3130203023010011231031301300213301100220<sup>T</sup>  
3112 10 3130203023010011231031330300213301100220203<sup>G</sup>

C

<sup>A</sup>3212022120012011133311002012011100  
<sup>A</sup>202212001201113301100201  
<sup>G</sup>0221200120111330110020120111003321  
<sup>C</sup>2223100023313011112211020202113321202212001201333301100201201110033213223112211120102322221133202  
CTCTACCCCTATGCCACACTCACCTTCCGTATCAGGAGTCCCAGGTAATTTGTTTCCAGGTGTTTATCATCTACAGACACTTGGATCTCTGTATCCT  
GAGATGGGGATACGGTGTGAGTGGAAGGACATAGTCCTCAGGGTCCATATAACAAAGGTCCACAAATAGTAGATGTCTGTGAACCTAGAGACATAGGA  
2223100023313011112211020202113321202212001201333301100201201110033213223112211120102322221133202<sup>A</sup>  
211332120221200120133330<sup>A</sup>  
1133212022120012011133211002012011<sup>C</sup>  
1133212022100012011133011002012011<sup>C</sup>

D

...2231000233130111122110202021133212022120012013  
<sup>C</sup>0022331301111221102020211332123221200120111330110  
<sup>T</sup>13011112211020201113311202212001101333301100....  
<sup>C</sup>1122110202021133212022120012011133011022012011100  
<sup>T</sup>0202113321202212001201113301100201202110033213223  
<sup>T</sup>3321202212001201333301100201201110033213223112211  
<sup>T</sup>332122212001201333301100201201110033213223112211  
<sup>A</sup>3212022120012011133311002012011100  
<sup>C</sup>120221200120133330110020  
<sup>A</sup>202212001201113301100201  
<sup>A</sup>2022120012011133011002012011100332132231122111201  
<sup>A</sup>2022120012011133011002012011100332132231122111201  
<sup>G</sup>0221200120111330110020120111003321  
<sup>T</sup>2001201333301100201201110033213223112211120102322  
<sup>C</sup>2223100023313011112211020202113321202212001201333301100201201110033213223112211120102322221133202  
CTCTACCCCTATGCCACACTCACCTTCCGTATCAGGAGTCCCAGGTAATTTGTTTCCAGGTGTTTATCATCTACAGACACTTGGATCTCTGTATCCT  
GAGATGGGGATACGGTGTGAGTGGAAGGACATAGTCCTCAGGGTCCATATAACAAAGGTCCACAAATAGTAGATGTCTGTGAACCTAGAGACATAGGA  
2223100023313011112211020202113321202212001201333301100201201110033213223112211120102322221133202<sup>A</sup>  
.....211332120221200120133330<sup>A</sup>  
0233110111222110202021033212022120012013333011002<sup>G</sup>  
0233130111122110202021133212022120012013333011002<sup>G</sup>  
1122110202021133212022120012011133011002012011100<sup>A</sup>  
1122110202021133212022120012013333011002012011100<sup>A</sup>  
2211020202113321202212001201333301100201201110033<sup>A</sup>  
211332120221200120133330<sup>A</sup>  
2113321202212001201113301100201201110033213223112<sup>C</sup>  
1133212022120012011133211002012011<sup>C</sup>  
1133212022100012011133011002012011<sup>C</sup>  
113321202212001201113301<sup>C</sup>  
321202212001201113301100<sup>A</sup>  
221200120111330110020120<sup>C</sup>  
212001201333301100201201<sup>A</sup>  
2120012011133011002012011100332132231122111201023<sup>A</sup>  
20012011133011002012011<sup>A</sup>  
1333301100201101110033213223112211120102322221133<sup>A</sup>

**Supplementary Figure 1.** Raw read coverage at key SNP positions for initial partial-coverage analysis (7.7x) compared to final full-coverage analysis (29.6x). Both strands of the reference genome are shown in sequence space in the middle, with the color-space renderings above and below. Reference bases of interest are shown in grey. Sequence reads are shown in color-space with reads mapping in the forward direction (plus strand) above the reference, and reads mapping in the reverse direction (minus strand) shown below. Reads that agree with the reference are highlighted in green at the SNP position, and reads that show the variant allele are highlighted in red.

A. Read coverage at chr5:148,386,628 for original ~7x coverage. Initial call was reference homozygote; the single variant read was rejected as an error. B. Full read coverage at the same position for the full ~30x coverage. The final call was a heterozygote with roughly equal numbers of reference and variant alleles seen in the full-coverage read stack. C. Read coverage at chr5:148,402,474 for the original ~7x coverage. The initial call was variant homozygote; the single reference read was rejected as an error. D. Full read coverage at the same position for the full ~30x coverage. The final call was a heterozygote with roughly equal numbers of reference and variant alleles seen in the final read stack.

Supplementary Table 1. CNVs found in neuropathy subject's genome

| Chr  | Cytoband | Start       | Stop        | Size    | Gain/Loss | NimbArray | Sequencing | DGV | Gene Names                        |
|------|----------|-------------|-------------|---------|-----------|-----------|------------|-----|-----------------------------------|
| chr1 | p36.33   | 533,728     | 558,620     | 24,892  | Loss      | -         | -          | √   |                                   |
| chr1 | p36.32   | 2,574,355   | 2,621,282   | 46,927  | Gain      | -         | Yes        | √   |                                   |
| chr1 | p36.21   | 12,822,189  | 12,835,212  | 13,023  | Gain      | -         | -          | √   | LOC649330, HNRNPCL1               |
| chr1 | p36.13   | 16,882,564  | 16,923,826  | 41,262  | Loss      | -         | Yes        | √   | ESPFP                             |
| chr1 | p36.13   | 17,080,364  | 17,152,572  | 72,208  | Loss      | -         | -          | √   | CROCC                             |
| chr1 | p36.11   | 25,465,575  | 25,531,629  | 66,054  | Loss      | Yes       | Yes        | √   | RHD                               |
| chr1 | p21.1    | 103,965,274 | 104,024,325 | 59,051  | Loss      | Yes       | -          | √   | AMY2A, AMY1A, AMY1A, AMY1C, AMY1B |
| chr1 | p13.1    | 116,970,390 | 116,999,657 | 29,267  | Gain      | Yes       | -          | √   | IGSF3                             |
| chr1 | p12      | 120,358,263 | 120,373,080 | 14,817  | Gain      | -         | -          | √   | NOTCH2                            |
| chr1 | p12      | 120,394,372 | 120,404,215 | 9,843   | Gain      | -         | -          | √   | NOTCH2                            |
| chr1 | p12      | 120,415,520 | 120,424,104 | 8,584   | Gain      | -         | -          | √   |                                   |
| chr1 | q21.1    | 143,383,856 | 143,411,618 | 27,762  | Gain      | -         | -          | √   | NBF20                             |
| chr1 | q21.1    | 143,686,863 | 143,791,202 | 104,339 | Gain      | -         | Yes        | √   | PDE4DIP                           |
| chr1 | q21.1    | 143,946,161 | 143,997,989 | 51,828  | Gain      | -         | Yes        | √   | NOTCH2NL                          |
| chr1 | q21.1    | 147,308,962 | 147,497,322 | 188,360 | Loss      | Yes       | Yes        | √   |                                   |
| chr1 | q21.3    | 150,824,358 | 150,853,324 | 28,966  | Loss      | -         | Yes        | √   | LCE3C, LCE3B                      |
| chr1 | q23.3    | 159,822,841 | 159,896,564 | 73,723  | Loss      | -         | -          | √   | FCGR3C, HSPA7, FCGR3B             |
| chr1 | q31.1    | 185,985,437 | 185,988,338 | 2,901   | Loss      | Yes       | -          | √   |                                   |
| chr1 | q31.3    | 194,990,451 | 195,089,902 | 99,451  | Gain      | -         | -          | √   | CFHR3, CFHR1                      |
| chr1 | q32.2    | 208,144,663 | 208,151,354 | 6,691   | Loss      | -         | Yes        | √   |                                   |
| chr2 | p25.3    | 4,194,978   | 4,200,314   | 5,336   | Loss      | -         | Yes        | √   |                                   |
| chr2 | p24.3    | 13,435,727  | 13,470,771  | 35,044  | Gain      | Yes       | -          | √   |                                   |
| chr2 | p24.3    | 13,502,161  | 13,513,640  | 11,479  | Gain      | Yes       | -          | √   |                                   |
| chr2 | p22.3    | 35,830,721  | 35,843,953  | 13,232  | Loss      | -         | Yes        | √   |                                   |
| chr2 | p16.3    | 52,604,016  | 52,638,315  | 34,299  | Loss      | Yes       | Yes        | √   |                                   |
| chr2 | p11.2    | 88,914,081  | 88,941,307  | 27,226  | Gain      | -         | -          | √   |                                   |
| chr2 | p11.2    | 88,989,954  | 89,111,166  | 121,212 | Gain      | -         | -          | √   |                                   |
| chr3 | p11.2    | 89,139,401  | 89,325,257  | 185,856 | Gain      | -         | -          | √   |                                   |
| chr2 | p11.2    | 89,617,972  | 89,680,223  | 62,251  | Gain      | -         | -          | √   |                                   |
| chr2 | p11.2    | 89,773,295  | 89,908,726  | 135,431 | Gain      | -         | -          | √   |                                   |
| chr2 | q12.2    | 106,247,167 | 106,249,746 | 2,579   | Loss      | Yes       | Yes        | √   |                                   |
| chr2 | q14.3    | 125,510,292 | 125,515,958 | 5,666   | Loss      | Yes       | Yes        | NO  |                                   |
| chr2 | q14.3    | 126,160,881 | 126,166,108 | 5,227   | Loss      | -         | -          | √   |                                   |
| chr2 | q22.3    | 146,579,846 | 146,592,834 | 12,988  | Gain      | Yes       | -          | √   |                                   |
| chr2 | q24.3    | 167,734,684 | 167,782,652 | 47,968  | Loss      | Yes       | Yes        | NO  | XIRP2                             |
| chr2 | q32.3    | 194,397,791 | 194,401,129 | 3,338   | Gain      | -         | -          | √   |                                   |
| chr2 | q33.3    | 208,059,576 | 208,066,304 | 6,728   | Gain      | -         | -          | √   |                                   |
| chr2 | q36.3    | 226,874,648 | 226,876,563 | 1,915   | Loss      | Yes       | -          | √   |                                   |
| chr3 | p26.1    | 6,627,047   | 6,628,889   | 1,842   | Loss      | Yes       | -          | √   |                                   |
| chr3 | p24.1    | 26,409,589  | 26,414,428  | 4,839   | Gain      | -         | -          | √   |                                   |
| chr3 | p22.2    | 37,955,930  | 37,961,169  | 5,239   | Loss      | Yes       | -          | √   | CTDSPL                            |
| chr3 | p14.1    | 65,165,476  | 65,189,354  | 23,878  | Loss      | Yes       | Yes        | √   |                                   |
| chr3 | p14.1    | 68,824,433  | 68,827,577  | 3,144   | Loss      | -         | -          | √   |                                   |
| chr3 | p12.3    | 75,840,737  | 75,853,111  | 12,374  | Gain      | -         | Yes        | √   |                                   |
| chr3 | p12.3    | 75,871,755  | 75,883,979  | 12,224  | Gain      | -         | Yes        | √   | ZNF717                            |
| chr3 | q12.1    | 100,426,538 | 100,431,236 | 4,698   | Loss      | Yes       | -          | √   |                                   |
| chr3 | q21.3    | 129,863,290 | 129,885,838 | 22,548  | Gain      | Yes       | Yes        | √   |                                   |
| chr3 | q24      | 147,868,241 | 147,871,099 | 2,858   | Gain      | -         | Yes        | √   |                                   |
| chr3 | q26.1    | 163,996,796 | 164,006,944 | 10,148  | Gain      | -         | Yes        | √   |                                   |
| chr3 | q26.1    | 164,030,531 | 164,108,709 | 78,178  | Gain      | Yes       | Yes        | √   |                                   |
| chr3 | q36.32   | 180,046,787 | 180,055,376 | 8,589   | Gain      | -         | -          | NO  |                                   |
| chr3 | q29      | 194,358,882 | 194,365,707 | 6,825   | Gain      | Yes       | -          | √   |                                   |
| chr4 | p16.1    | 9,821,327   | 9,842,703   | 21,376  | Gain      | Yes       | Yes        | √   |                                   |
| chr4 | p16.1    | 10,006,532  | 10,009,259  | 2,727   | Loss      | -         | Yes        | √   |                                   |
| chr4 | p15.2    | 25,901,935  | 25,904,465  | 2,530   | Loss      | -         | Yes        | √   |                                   |
| chr4 | p15.1    | 34,457,648  | 34,502,838  | 45,190  | Gain      | -         | -          | √   |                                   |
| chr4 | p13      | 40,922,497  | 40,926,391  | 3,894   | Loss      | -         | -          | √   |                                   |
| chr4 | p13      | 42,459,138  | 42,462,922  | 3,784   | Loss      | Yes       | -          | √   |                                   |
| chr4 | q13.1    | 63,817,412  | 63,834,857  | 17,445  | Loss      | Yes       | Yes        | √   |                                   |

Supplementary Table 1. CNVs found in neuropathy subject's genome

| Chr  | Cytoband | Start       | Stop        | Size    | Gain/Loss | NimbArray | Sequencing | DGV | Gene Names                                                                             |
|------|----------|-------------|-------------|---------|-----------|-----------|------------|-----|----------------------------------------------------------------------------------------|
| chr4 | q13.2    | 69,046,097  | 69,173,429  | 127,332 | Gain      | Yes       | -          | √   | UGT2B17                                                                                |
| chr4 | q13.2    | 69,428,281  | 69,437,322  | 9,041   | Gain      | -         | -          | √   |                                                                                        |
| chr4 | q13.2    | 70,162,113  | 70,264,574  | 102,461 | Gain      | -         | -          | √   | UGT2B28                                                                                |
| chr4 | q13.2    | 70,317,017  | 70,323,600  | 6,583   | Gain      | -         | -          | √   |                                                                                        |
| chr4 | q24      | 107,278,051 | 107,281,469 | 3,418   | Gain      | -         | -          | √   | TBCKL                                                                                  |
| chr4 | q25      | 108,731,380 | 108,734,061 | 2,681   | Loss      | -         | -          | √   |                                                                                        |
| chr4 | q32.3    | 169,047,365 | 169,228,589 | 181,224 | Gain      | -         | -          | √   |                                                                                        |
| chr4 | q34.1    | 172,613,413 | 172,615,132 | 1,719   | Loss      | -         | Yes        | √   |                                                                                        |
| chr4 | q34.1    | 173,662,973 | 173,666,131 | 3,158   | Loss      | -         | Yes        | √   | GALNTL6                                                                                |
| chr4 | q35.1    | 185,395,604 | 185,404,326 | 8,722   | Gain      | -         | -          | √   |                                                                                        |
| chr4 | q35.2    | 187,331,981 | 187,333,678 | 1,697   | Gain      | -         | -          | √   |                                                                                        |
| chr5 | p15.33   | 796,917     | 819,095     | 22,178  | Gain      | -         | -          | √   |                                                                                        |
| chr5 | p15.33   | 848,744     | 877,163     | 28,419  | Gain      | -         | -          | √   | ZDHHC11                                                                                |
| chr5 | p15.32   | 5,736,140   | 5,767,243   | 31,103  | Gain      | -         | Yes        | √   |                                                                                        |
| chr5 | p15.2    | 12,866,038  | 12,873,111  | 7,073   | Loss      | Yes       | -          | √   |                                                                                        |
| chr5 | p14.1    | 26,829,830  | 26,835,669  | 5,839   | Loss      | -         | Yes        | √   |                                                                                        |
| chr5 | p14.1    | 27,555,061  | 27,564,501  | 9,440   | Loss      | Yes       | Yes        | √   |                                                                                        |
| chr5 | q31.3    | 140,203,808 | 140,215,068 | 11,260  | Gain      | -         | -          | √   | PCDHA1, PCDHA1, PCDHA2, PCDHA3, PCDHA4, PCDHA5, PCDHA6, PCDHA7, PCDHA8, PCDHA9, PCDHA9 |
| chr5 | q33.1    | 150,185,202 | 150,201,204 | 16,002  | Loss      | Yes       | Yes        | √   |                                                                                        |
| chr5 | q35.3    | 180,311,280 | 180,363,151 | 51,871  | Gain      | -         | -          | √   | LOC646227, BTNL3                                                                       |
| chr6 | p25.3    | 202,063     | 239,298     | 37,235  | Loss      | Yes       | -          | √   | DUSP22                                                                                 |
| chr6 | p21.33   | 29,962,849  | 30,012,493  | 49,644  | Gain      | -         | -          | √   | HLA-H, HCG2P7, HCG4P6                                                                  |
| chr6 | p21.33   | 31,344,074  | 31,348,964  | 4,890   | Loss      | -         | -          | √   | HLA-C                                                                                  |
| chr6 | p21.32   | 32,564,884  | 32,576,892  | 12,008  | Loss      | -         | Yes        | √   |                                                                                        |
| chr6 | p21.32   | 32,593,151  | 32,609,584  | 16,433  | Loss      | -         | Yes        | √   | HLA-DRB5                                                                               |
| chr6 | p21.32   | 32,637,654  | 32,649,896  | 12,242  | Gain      | -         | Yes        | √   |                                                                                        |
| chr6 | p21.32   | 32,711,957  | 32,731,131  | 19,174  | Gain      | -         | Yes        | √   | HLA-DQA1                                                                               |
| chr6 | p12.1    | 54,037,199  | 54,042,793  | 5,594   | Gain      | -         | -          | √   | C6orf142                                                                               |
| chr6 | q12      | 66,208,637  | 66,216,847  | 8,210   | Gain      | -         | -          | √   | EYS                                                                                    |
| chr6 | q12      | 67,065,465  | 67,101,414  | 35,949  | Loss      | Yes       | Yes        | √   |                                                                                        |
| chr6 | q14.1    | 77,499,382  | 77,509,119  | 9,737   | Gain      | Yes       | -          | √   |                                                                                        |
| chr6 | q14.1    | 79,025,643  | 79,091,909  | 66,266  | Gain      | Yes       | -          | √   |                                                                                        |
| chr6 | q14.1    | 81,341,711  | 81,348,229  | 6,518   | Loss      | Yes       | Yes        | √   |                                                                                        |
| chr6 | q16.3    | 103,850,838 | 103,857,715 | 6,877   | Loss      | -         | Yes        | √   |                                                                                        |
| chr6 | q27      | 170,852,008 | 170,881,324 | 29,316  | Loss      | -         | -          | √   |                                                                                        |
| chr7 | p22.2    | 3,578,949   | 3,584,193   | 5,244   | Gain      | -         | -          | √   | SDK1                                                                                   |
| chr7 | p15.2    | 26,103,844  | 26,108,428  | 4,584   | Gain      | Yes       | -          | √   |                                                                                        |
| chr7 | p12.1    | 51,562,878  | 51,565,523  | 2,645   | Loss      | -         | Yes        | √   |                                                                                        |
| chr7 | q11.23   | 71,910,098  | 71,912,133  | 2,035   | Loss      | Yes       | -          | √   | TYW1B                                                                                  |
| chr7 | q11.23   | 75,984,055  | 75,987,589  | 3,534   | Loss      | -         | Yes        | √   | UPK3B                                                                                  |
| chr7 | q21.11   | 85,464,873  | 85,470,821  | 5,948   | Gain      | -         | -          | NO  |                                                                                        |
| chr7 | q33      | 133,437,464 | 133,447,927 | 10,463  | Gain      | Yes       | Yes        | √   |                                                                                        |
| chr7 | q34      | 141,700,432 | 141,714,227 | 13,795  | Loss      | Yes       | Yes        | √   |                                                                                        |
| chr7 | q35      | 143,528,075 | 143,692,010 | 163,935 | Loss      | -         | -          | √   | OR2A1, OR2A42, OR2A9P, OR2A20P, OR2A7, OR2A1, ARHGEF5                                  |
| chr7 | q36.2    | 154,024,885 | 154,029,188 | 4,303   | Gain      | -         | -          | √   | DPP6, DPP6, DPP6                                                                       |
| chr7 | q36.3    | 158,811,268 | 158,815,216 | 3,948   | Gain      | -         | -          | √   |                                                                                        |
| chr8 | p23.3    | 17,264      | 44,424      | 27,160  | Loss      | -         | -          | √   |                                                                                        |
| chr8 | p23.3    | 586,165     | 588,585     | 2,420   | Gain      | Yes       | -          | √   |                                                                                        |
| chr8 | p23.2    | 2,526,661   | 2,539,247   | 12,586  | Gain      | -         | -          | √   |                                                                                        |
| chr8 | p23.1    | 6,824,697   | 6,859,970   | 35,273  | Loss      | Yes       | -          | √   | DEFA1, LOC728358, DEFA1, LOC728358                                                     |
| chr8 | p23.1    | 11,250,976  | 11,254,937  | 3,961   | Gain      | -         | -          | √   | TDH                                                                                    |
| chr8 | p23.1    | 12,022,689  | 12,035,685  | 12,996  | Gain      | -         | Yes        | √   | FAM66D, DUB3                                                                           |
| chr8 | p23.1    | 12,275,885  | 12,286,448  | 10,563  | Loss      | -         | Yes        | √   | FAM66A                                                                                 |
| chr8 | p12      | 32,800,775  | 32,810,135  | 9,360   | Loss      | -         | Yes        | NO  |                                                                                        |
| chr8 | q12.1    | 58,082,382  | 58,090,214  | 7,832   | Loss      | -         | Yes        | NO  |                                                                                        |
| chr8 | q12.1    | 58,277,102  | 58,285,421  | 8,319   | Gain      | -         | Yes        | √   |                                                                                        |
| chr8 | q22.1    | 96,946,000  | 96,948,094  | 2,094   | Loss      | Yes       | -          | √   |                                                                                        |
| chr8 | q23.3    | 115,705,054 | 115,711,789 | 6,735   | Loss      | Yes       | -          | √   |                                                                                        |
| chr8 | q24.3    | 144,771,984 | 144,785,852 | 13,868  | Gain      | -         | -          | √   |                                                                                        |

Supplementary Table 1. CNVs found in neuropathy subject's genome

| Chr   | Cytoband      | Start       | Stop        | Size      | Gain/Loss | NimbArray | Sequencing | DGV | Gene Names                                                                                                         |
|-------|---------------|-------------|-------------|-----------|-----------|-----------|------------|-----|--------------------------------------------------------------------------------------------------------------------|
| chr9  | p21.3         | 22,486,980  | 22,492,662  | 5,682     | Gain      | -         | -          | √   |                                                                                                                    |
| chr9  | p21.3         | 23,353,267  | 23,365,998  | 12,731    | Loss      | -         | Yes        | √   |                                                                                                                    |
| chr9  | p11.2         | 43,550,770  | 43,562,159  | 11,389    | Gain      | -         | -          | √   |                                                                                                                    |
| chr9  | q31.1         | 103,754,775 | 103,763,361 | 8,586     | Loss      | Yes       | Yes        | √   |                                                                                                                    |
| chr9  | q34.3         | 138,787,852 | 138,794,546 | 6,694     | Loss      | -         | Yes        | √   |                                                                                                                    |
| chr10 | p15.1 - p14   | 6,695,343   | 6,702,493   | 7,150     | Gain      | -         | -          | √   |                                                                                                                    |
| chr10 | p11.23        | 31,286,901  | 31,291,725  | 4,824     | Gain      | -         | -          | √   | ZNF438, ZNF438, ZNF438                                                                                             |
| chr10 | p11.21        | 37,500,439  | 37,508,602  | 8,163     | Loss      | Yes       | -          | √   | ANKRD30A                                                                                                           |
| chr10 | p11.21        | 37,512,212  | 37,522,801  | 10,589    | Loss      | Yes       | -          | √   | ANKRD30A                                                                                                           |
| chr10 | q11.22        | 46,321,769  | 46,834,292  | 512,523   | Loss      | -         | Yes        | √   | SYT15, SYT15, GPRIN2, PPYR1, LOC728643, ANXA8, ANXA8L1, FAM25C, FAM25G, FAM25B, LOC642826, ANTXRL, ANXA8L2, FAM21B |
| chr10 | q11.22        | 47,057,097  | 47,172,593  | 115,496   | Loss      | -         | -          | √   | ANTXRL                                                                                                             |
| chr10 | q11.22        | 47,732,038  | 47,746,367  | 14,329    | Loss      | -         | -          | √   |                                                                                                                    |
| chr10 | q21.1         | 56,118,633  | 56,138,826  | 20,193    | Loss      | -         | -          | √   | PCDH15, PCDH15, PCDH15                                                                                             |
| chr10 | q26.13        | 124,335,715 | 124,340,556 | 4,841     | Gain      | -         | -          | √   | DMBT1                                                                                                              |
| chr11 | p15.4         | 4,926,383   | 4,932,273   | 5,890     | Loss      | Yes       | Yes        | √   |                                                                                                                    |
| chr11 | p15.4         | 5,742,476   | 5,765,192   | 22,716    | Gain      | -         | -          | √   | OR52N5                                                                                                             |
| chr11 | p15.1         | 18,050,268  | 18,058,426  | 8,158     | Loss      | Yes       | Yes        | NO  | SAAL1                                                                                                              |
| chr11 | p15.1         | 18,906,505  | 18,920,218  | 13,713    | Gain      | -         | -          | √   | MRGPRX1                                                                                                            |
| chr11 | p14.3         | 24,400,064  | 24,407,975  | 7,911     | Gain      | -         | -          | √   |                                                                                                                    |
| chr11 | p14.1         | 28,964,993  | 28,968,003  | 3,010     | Gain      | -         | -          | √   |                                                                                                                    |
| chr11 | p11.2         | 48,558,648  | 48,560,338  | 1,690     | Loss      | -         | Yes        | √   |                                                                                                                    |
| chr11 | p11.12        | 49,666,382  | 49,713,606  | 47,224    | Gain      | -         | -          | √   | LOC440040                                                                                                          |
| chr11 | q11           | 55,124,730  | 55,209,599  | 84,869    | Loss      | Yes       | -          | √   | OR4C11, OR4P4, OR4S2, OR4C6                                                                                        |
| chr11 | q13.3         | 69,754,380  | 69,761,044  | 6,664     | Loss      | Yes       | Yes        | √   |                                                                                                                    |
| chr11 | q25           | 131,427,991 | 131,434,718 | 6,727     | Gain      | -         | -          | √   | NTM                                                                                                                |
| chr12 | p13.33        | 2,120,303   | 2,125,563   | 5,260     | Gain      | -         | -          | √   | CACNA1C                                                                                                            |
| chr12 | p13.31        | 9,528,351   | 9,621,934   | 93,583    | Gain      | Yes       | -          | √   |                                                                                                                    |
| chr12 | p13.2         | 11,109,511  | 11,147,734  | 38,223    | Loss      | -         | Yes        | √   | PRR4, PRH1, TAS2R43                                                                                                |
| chr12 | p13.2         | 11,398,676  | 11,435,698  | 37,022    | Loss      | -         | -          | √   | PRB1, PRB2                                                                                                         |
| chr12 | p11.21        | 31,158,728  | 31,244,248  | 85,520    | Gain      | -         | Yes        | √   |                                                                                                                    |
| chr12 | p11.21        | 31,943,340  | 31,949,540  | 6,200     | Loss      | -         | Yes        | √   |                                                                                                                    |
| chr12 | p11.1         | 33,278,235  | 33,286,046  | 7,811     | Gain      | Yes       | -          | √   |                                                                                                                    |
| chr12 | q14.1         | 58,808,105  | 58,811,295  | 3,190     | Gain      | -         | -          | √   |                                                                                                                    |
| chr12 | q23.1         | 98,319,657  | 98,325,197  | 5,540     | Loss      | -         | Yes        | √   | ANKS1B                                                                                                             |
| chr12 | q24.33        | 130,697,010 | 130,701,099 | 4,089     | Loss      | -         | Yes        | √   |                                                                                                                    |
| chr13 | q11           | 18,073,090  | 18,086,981  | 13,891    | Gain      | Yes       | -          | √   |                                                                                                                    |
| chr13 | q11           | 18,244,343  | 18,259,026  | 14,683    | Gain      | -         | -          | √   |                                                                                                                    |
| chr13 | q13.2         | 33,033,905  | 33,042,616  | 8,711     | Gain      | -         | -          | √   |                                                                                                                    |
| chr13 | q13.3         | 36,971,154  | 36,982,936  | 11,782    | Loss      | -         | Yes        | √   |                                                                                                                    |
| chr13 | q21.31        | 60,861,761  | 60,868,375  | 6,614     | Gain      | -         | -          | √   |                                                                                                                    |
| chr13 | q21.33        | 69,636,273  | 69,671,404  | 35,131    | Gain      | -         | -          | √   |                                                                                                                    |
| chr13 | q33.3         | 107,745,062 | 107,749,740 | 4,678     | Loss      | -         | -          | NO  | TNFSF13B, TNFSF13B                                                                                                 |
| chr14 | q11.1         | 18,482,027  | 18,537,236  | 55,209    | Loss      | -         | -          | √   |                                                                                                                    |
| chr14 | q11.1 - q11.2 | 18,539,864  | 19,235,908  | 696,044   | Loss      | -         | -          | √   | POTEG, P704P                                                                                                       |
| chr14 | q11.2         | 19,622,160  | 19,624,876  | 2,716     | Gain      | -         | -          | √   |                                                                                                                    |
| chr14 | q21.1         | 39,679,948  | 39,686,773  | 6,825     | Loss      | Yes       | Yes        | √   |                                                                                                                    |
| chr14 | q24.1         | 69,088,190  | 69,092,270  | 4,080     | Loss      | -         | -          | √   |                                                                                                                    |
| chr14 | q24.3         | 73,080,191  | 73,107,478  | 27,287    | Gain      | -         | Yes        | √   | HEATR4, ACOT1, ACOT2                                                                                               |
| chr14 | q32.33        | 105,312,580 | 105,393,261 | 80,681    | Gain      | -         | -          | √   |                                                                                                                    |
| chr14 | q32.33        | 105,403,001 | 105,428,738 | 25,737    | Gain      | -         | -          | √   |                                                                                                                    |
| chr14 | q32.33        | 105,434,073 | 105,599,350 | 165,277   | Gain      | Yes       | -          | √   | KIAA0125, ADAM6                                                                                                    |
| chr14 | q32.33        | 105,602,602 | 105,637,941 | 35,339    | Loss      | Yes       | -          | √   |                                                                                                                    |
| chr14 | q32.33        | 105,641,753 | 105,894,508 | 252,755   | Gain      | -         | -          | √   |                                                                                                                    |
| chr14 | q32.33        | 105,957,708 | 106,002,104 | 44,396    | Loss      | Yes       | -          | √   |                                                                                                                    |
| chr14 | q32.33        | 106,219,784 | 106,253,703 | 33,919    | Gain      | -         | -          | √   |                                                                                                                    |
| chr15 | q11.2         | 18,464,929  | 20,092,742  | 1,627,813 | Gain      | Yes       | Yes        | √   | LOC727832, GOLGA8C, LOC646214, CXADRP2, POTEB, LOC727924, OR4M2, OR4N4, LOC650137                                  |
| chr15 | q11.2         | 21,009,492  | 21,065,244  | 55,752    | Gain      | Yes       | -          | √   |                                                                                                                    |
| chr15 | q14           | 32,496,813  | 32,644,364  | 147,551   | Gain      | -         | -          | √   | GOLGA8A, GOLGA8B, GOLGA8B                                                                                          |
| chr15 | q24.3         | 74,678,353  | 74,682,295  | 3,942     | Gain      | -         | -          | √   | SCAPER, SCAPER                                                                                                     |

Supplementary Table 1. CNVs found in neuropathy subject's genome

| Chr   | Cytoband        | Start      | Stop       | Size    | Gain/Loss | NimbArray | Sequencing | DGV | Gene Names                                                                                         |
|-------|-----------------|------------|------------|---------|-----------|-----------|------------|-----|----------------------------------------------------------------------------------------------------|
| chr15 | q24.3           | 75,117,799 | 75,119,772 | 1,973   | Loss      | -         | Yes        | √   |                                                                                                    |
| chr16 | p12.2           | 21,444,541 | 21,498,345 | 53,804  | Gain      | -         | Yes        | √   |                                                                                                    |
| chr16 | p12.1           | 22,530,238 | 22,617,276 | 87,038  | Gain      | -         | Yes        | √   | LOC653786                                                                                          |
| chr16 | p11.2           | 32,121,449 | 32,217,244 | 95,795  | Loss      | -         | -          | √   |                                                                                                    |
| chr16 | p11.2           | 32,475,309 | 32,562,578 | 87,269  | Loss      | -         | -          | √   |                                                                                                    |
| chr16 | p11.2           | 33,499,350 | 33,536,585 | 37,235  | Loss      | -         | -          | √   |                                                                                                    |
| chr16 | p11.2 - p11.1   | 34,325,501 | 34,614,367 | 288,866 | Loss      | Yes       | -          | √   | LOC283914, LOC283914, LOC146481                                                                    |
| chr16 | p11.1           | 35,102,881 | 35,112,822 | 9,941   | Loss      | -         | -          | √   |                                                                                                    |
| chr16 | q11.2           | 44,943,402 | 44,988,282 | 44,880  | Loss      | -         | -          | √   |                                                                                                    |
| chr16 | q22.1           | 68,707,057 | 68,763,721 | 56,664  | Loss      | -         | -          | √   | PDPR                                                                                               |
| chr16 | q23.1           | 76,929,598 | 76,941,510 | 11,912  | Gain      | -         | -          | √   | WVVOX                                                                                              |
| chr16 | q23.2           | 79,535,121 | 79,538,057 | 2,936   | Loss      | Yes       | -          | √   |                                                                                                    |
| chr17 | q12             | 31,546,207 | 31,891,607 | 345,400 | Loss      | Yes       | -          | √   | CCL3L1, CCL3L3, CCL4L1, CCL4L2, TBC1D3C, CCL3L1, CCL3L3, CCL4L2, CCL4L1, TBC1D3H, TBC1D3C, TBC1D3G |
| chr17 | q12             | 33,333,517 | 33,384,910 | 51,393  | Loss      | -         | -          | √   | TBC1D3F                                                                                            |
| chr17 | q21.2           | 36,675,987 | 36,680,616 | 4,629   | Loss      | -         | Yes        | √   |                                                                                                    |
| chr17 | q21.31          | 41,020,105 | 41,060,458 | 40,353  | Gain      | Yes       | -          | √   | LOC644172, MGC57346, MGC57346                                                                      |
| chr17 | q21.31          | 41,568,539 | 41,642,565 | 74,026  | Gain      | Yes       | Yes        | √   | KIAA1267                                                                                           |
| chr17 | q21.31 - q21.32 | 41,670,262 | 42,137,274 | 467,012 | Gain      | Yes       | Yes        | √   | LRRC37A, ARL17, LRRC37A2, ARL17P1, ARL17P1, ARL17, NSF                                             |
| chr17 | q24.1           | 60,345,240 | 60,357,798 | 12,558  | Gain      | Yes       | -          | √   | LRRC37A3                                                                                           |
| chr17 | q25.3           | 76,218,706 | 76,226,410 | 7,704   | Gain      | Yes       | -          | NO  | RPTOR                                                                                              |
| chr18 | p11.21          | 14,273,202 | 14,293,156 | 19,954  | Gain      | -         | Yes        | √   |                                                                                                    |
| chr18 | p11.21          | 14,439,843 | 14,534,484 | 94,641  | Gain      | Yes       | -          | √   | CXADRP3, POTEK                                                                                     |
| chr18 | q12.3           | 40,230,827 | 40,235,960 | 5,133   | Loss      | Yes       | Yes        | √   |                                                                                                    |
| chr18 | q21.2           | 49,460,662 | 49,464,492 | 3,830   | Gain      | -         | -          | √   |                                                                                                    |
| chr19 | q13.11          | 38,176,810 | 38,188,500 | 11,690  | Gain      | Yes       | -          | NO  |                                                                                                    |
| chr19 | q13.31          | 48,397,016 | 48,455,618 | 58,602  | Gain      | Yes       | -          | √   | PSG4, PSG9                                                                                         |
| chr19 | q13.41          | 58,212,113 | 58,241,832 | 29,719  | Loss      | -         | -          | √   |                                                                                                    |
| chr19 | q13.42          | 59,418,579 | 59,434,216 | 15,637  | Gain      | -         | -          | √   | LILRB3, LILRA6                                                                                     |
| chr19 | q13.42          | 59,492,764 | 59,498,720 | 5,956   | Gain      | -         | -          | √   | LILRA3                                                                                             |
| chr20 | p13             | 1,509,459  | 1,541,599  | 32,140  | Loss      | -         | Yes        | √   | SIRPB1, SIRPB1                                                                                     |
| chr21 | q11.2           | 13,890,329 | 14,031,327 | 140,998 | Gain      | Yes       | -          | √   | POTED, LOC441956                                                                                   |
| chr21 | q21.2           | 24,756,302 | 25,018,441 | 262,139 | Gain      | Yes       | Yes        | NO  |                                                                                                    |
| chr21 | q22.3           | 43,649,217 | 43,660,977 | 11,760  | Loss      | -         | -          | √   | SIK1                                                                                               |
| chr22 | q11.21          | 17,091,100 | 17,253,816 | 162,716 | Gain      | Yes       | -          | √   | GGT3P                                                                                              |
| chr22 | q11.21          | 18,705,549 | 18,731,613 | 26,064  | Gain      | Yes       | -          | √   |                                                                                                    |
| chr22 | q11.21          | 18,758,765 | 18,854,922 | 96,157  | Loss      | -         | -          | √   | P14KAP1, RIMBP3                                                                                    |
| chr22 | q11.21          | 18,971,693 | 18,989,606 | 17,913  | Gain      | Yes       | -          | √   |                                                                                                    |
| chr22 | q11.21          | 19,796,445 | 20,021,759 | 225,314 | Gain      | Yes       | -          | √   | POM121L8P                                                                                          |
| chr22 | q11.21          | 20,043,011 | 20,058,135 | 15,124  | Loss      | -         | -          | √   |                                                                                                    |
| chr22 | q11.21          | 20,152,530 | 20,241,815 | 89,285  | Loss      | -         | -          | √   | P14KAP2, RIMBP3B, RIMBP3C                                                                          |
| chr22 | q11.22          | 20,785,436 | 20,932,348 | 146,912 | Gain      | -         | -          | √   | VPREB1                                                                                             |
| chr22 | q11.22          | 20,999,667 | 21,292,917 | 293,250 | Gain      | -         | -          | √   | VPREB1, LOC96610, ZNF280B, ZNF280A, PRAME, LOC648691                                               |
| chr22 | q11.22          | 21,327,935 | 21,484,188 | 156,253 | Gain      | -         | -          | √   | POM121L1P, GGTL2                                                                                   |
| chr22 | q11.22          | 21,485,941 | 21,568,919 | 82,978  | Gain      | -         | -          | √   |                                                                                                    |
| chr22 | q11.23          | 22,606,174 | 22,669,363 | 63,189  | Loss      | -         | Yes        | √   | GSTT2B, GSTT2, DDTL, DDT, DDT, GSTT2                                                               |
| chr22 | q11.23          | 22,677,959 | 22,725,353 | 47,394  | Gain      | Yes       | Yes        | √   | LOC391322, GSTT1, GSTTP2                                                                           |
| chr22 | q12.2           | 28599591   | 28613059   | 13468   | Gain      | Yes       | -          | NO  | MTMR3                                                                                              |
| chr22 | q13.1           | 37689058   | 37715461   | 26403   | Loss      | Yes       | Yes        | √   | APOBEC3A, APOBEC3B                                                                                 |
| chr22 | q13.33          | 48708883   | 48714608   | 5725    | Loss      | -         | -          | NO  |                                                                                                    |
| chrX  | q12             | 67041234   | 67045513   | 4279    | Loss      | Yes       | Yes        | √   |                                                                                                    |
| chrX  | q21.31          | 90377597   | 90398299   | 20702   | Loss      | Yes       | Yes        | NO  |                                                                                                    |
| chrX  | q21.32          | 92683913   | 92687245   | 3332    | Loss      | -         | Yes        | √   |                                                                                                    |
| chrX  | q26.3           | 134760449  | 134783844  | 23395   | Loss      | Yes       | -          | √   |                                                                                                    |
| chrX  | q28             | 153075064  | 153177200  | 102136  | Loss      | -         | -          | √   | OPN1LW, OPN1MW, OPN1MW2, OPN1MW, OPN1MW2, TEX28, TKTL1                                             |
| chrX  | q28             | 154447839  | 154449727  | 1888    | Loss      | Yes       | -          | √   | TMLHE                                                                                              |
| chrY  | p11.2           | 3773948    | 3780900    | 6952    | Gain      | -         | Yes        | √   |                                                                                                    |
| chrY  | p11.2           | 4629543    | 4637623    | 8080    | Loss      | Yes       | -          | √   |                                                                                                    |

Supplementary Table 2. nsSNPs cross-referenced to the Human Gene Mutation Database

| HGMD_Disease                                                      | Type    | OMIM    | chr   | position  | strand | ref-snp | obs-snp | rs_id      | HUGO_Sym | AA_change | Prot_Pos | HGMD_ID  | Reference                                            |
|-------------------------------------------------------------------|---------|---------|-------|-----------|--------|---------|---------|------------|----------|-----------|----------|----------|------------------------------------------------------|
| Alcoholism, increased risk, association with ?                    | Beh Dis |         | chr4  | 100479812 | -      | T       | Y       | rs698      | ADH1C    | Ile-Val   | 350      | CM033593 | Konishi Exp Mol Pathol 74 183 2003                   |
| Mood disorders, reduced risk of childhood-onset, association with | Beh Dis |         | chr1  | 204391258 | +      | G       | S       | rs35369693 | AVPR1B   | Lys-Asn   | 65       | N        | Dempster Arch Gen Psychiatry 64 1189 2007            |
| Schizophrenia, association with ?                                 | Beh Dis |         | chr20 | 5851848   | +      | C       | S       | rs236152   | CHGB     | Ala-Gly   | 353      | CM043990 | Iijima Biol Psychiatry 56 10 2004                    |
| Schizophrenia, association with ?                                 | Beh Dis |         | chr20 | 5852040   | -      | G       | R       | rs742711   | CHGB     | Arg-His   | 417      | CM043991 | Iijima Biol Psychiatry 56 10 2004                    |
| Schizophrenia, association with                                   | Beh Dis |         | chr3  | 336508    | +      | C       | T       | rs2272522  | CHL1     | Leu-Phe   | 17       | CM023348 | Sakurai Mol Psychiatry 7 412 2002                    |
| Bipolar affective disorder, association with                      | Beh Dis |         | chr22 | 18331271  | +      | G       | A       | rs4680     | COMT     | Val-Met   | 158      | CM960420 | Lachman Am J Med Genet 67 468 1996                   |
| Schizophrenia, association with ?                                 | Beh Dis |         | chr13 | 104917447 | +      | G       | R       | rs2391191  | DAOA     | Arg-Lys   | 30       | CM045704 | Wang Biochem Biophys Res Commun 319 1281 2004        |
| Schizophrenia, risk, association with                             | Beh Dis |         | chr1  | 230211221 | -      | A       | W       | rs821616   | DISC1    | Ser-Cys   | 704      | CM051907 | Callicott Proc Natl Acad Sci U S A 102 8627 2005     |
| Drug/alcohol abuse, association with                              | Beh Dis |         | chr1  | 46643348  | +      | C       | M       | rs324420   | FAAH     | Pro-Thr   | 129      | CM023913 | Sipe Proc Natl Acad Sci U S A 99 8394 2002           |
| Depressive disorder, reduced risk, association with ?             | Beh Dis |         | chr17 | 44942818  | +      | C       | Y       | rs2072446  | NGFR     | Ser-Leu   | 205      | CM042757 | Kunugi Am J Med Genet 129B 44 2004                   |
| Schizophrenia, association with                                   | Beh Dis |         | chr8  | 20082746  | +      | T       | K       | rs2270641  | SLC18A1  | Thr-Pro   | 4        | CM057213 | Bly Schizophr Res 78 337 2005                        |
| Lung cancer, susceptibility to, association with                  | Cancer  |         | chr17 | 19802050  | -      | C       | Y       | rs2108978  | AKAP10   | Arg-His   | 249      | CM067336 | Rudd Genome Res 16 693 2006                          |
| Colorectal cancer, increased risk, association with               | Cancer  |         | chr10 | 81916682  | -      | G       | R       | rs1049550  | ANXA11   | Arg-Cys   | 230      | CM064971 | Webb Hum Mol Genet 15 3263 2006                      |
| Cutaneous melanoma, association with ?                            | Cancer  |         | chr14 | 19994994  | +      | T       | G       | rs1130409  | APEX1    | Asp-Glu   | 148      | CM063843 | Li Carcinogenesis 27 1894 2006                       |
| Lung cancer, reduced risk in Mexican Americans, association with  | Cancer  |         | chr1  | 155173739 | +      | T       | Y       | rs63387061 | ARHGEF11 | Ser-Gly   | 1416     | CM061640 | Gu Cancer 106 2707 2006                              |
| Cancer, association with                                          | Cancer  |         | chr13 | 49103026  | -      | T       | Y       | rs3803185  | ARL11    | Cys-Arg   | 148      | CM062430 | Frank Int J Cancer 118 2505 2006                     |
| Oesophageal cancer, association with                              | Cancer  |         | chr20 | 54394948  | +      | A       | W       | rs2273535  | AURKA    | Phe-Ile   | 31       | CM042940 | Miao Cancer Res 64 2680 2004                         |
| Lung cancer, susceptibility to, association with                  | Cancer  |         | chr6  | 31718665  | -      | A       | G       | rs60202657 | BAT3     | Ser-Pro   | 625      | CM067350 | Rudd Genome Res 16 693 2006                          |
| Breast cancer ?                                                   | Cancer  |         | chr17 | 38497035  | -      | T       | Y       | rs28897689 | BRCA1    | Arg-Gly   | 1347     | CM960181 | Durocher Hum Mol Genet 5 835 1996                    |
| Breast cancer, association with                                   | Cancer  |         | chr13 | 31804729  | -      | A       | M       | rs144848   | BRCA2    | Asn-His   | 372      | CM002750 | Healey Nat Genet 26 362 2000                         |
| Colorectal cancer, increased risk, association with               | Cancer  |         | chr1  | 8939791   | +      | A       | R       | rs2274333  | CA6      | Ser-Gly   | 90       | CM065045 | Webb Hum Mol Genet 15 3263 2006                      |
| Lung cancer, susceptibility to, association with                  | Cancer  |         | chr17 | 3722597   | +      | T       | Y       | rs17855558 | CAMKK1   | Glu-Gly   | 375      | CM067356 | Rudd Genome Res 16 693 2006                          |
| Cancer, association with                                          | Cancer  |         | chr6  | 36759949  | +      | C       | M       | rs1801270  | CDKN1A   | Ser-Arg   | 31       | CM940226 | Mousses Hum Mol Genet 4 1089 1995                    |
| Lung cancer, susceptibility to, association with                  | Cancer  |         | chr1  | 145207126 | +      | C       | S       | rs17356233 | CHD1L    | His-Gln   | 350      | CM067658 | Rudd Genome Res 16 693 2006                          |
| Colorectal cancer, increased risk, association with               | Cancer  |         | chr1  | 201460809 | +      | C       | Y       | rs2297950  | CNT1     | Gly-Ser   | 102      | CM065066 | Webb Hum Mol Genet 15 3263 2006                      |
| Lung cancer, susceptibility to, association with                  | Cancer  |         | chr6  | 75854022  | -      | C       | T       | rs970547   | COL12A1  | Gly-Ser   | 3058     | CM067364 | Rudd Genome Res 16 693 2006                          |
| Lung cancer, susceptibility to, association with                  | Cancer  |         | chr1  | 158018690 | +      | G       | R       | rs1129923  | DUSP23   | Gly-Ser   | 131      | CM067373 | Rudd Genome Res 16 693 2006                          |
| Lung cancer, susceptibility to, association with                  | Cancer  |         | chr17 | 53626093  | +      | G       | C       | rs11652709 | EPX      | Gln-His   | 122      | CM067664 | Rudd Genome Res 16 693 2006                          |
| Ovarian cancer susceptibility, association with                   | Cancer  |         | chr2  | 49044545  | -      | C       | T       | rs6165     | FSHR     | Ala-Thr   | 307      | CM062747 | Yang Carcinogenesis 27 1502 2006                     |
| Cancer risk, association with                                     | Cancer  |         | chr10 | 106012779 | +      | C       | M       | rs4925     | GSTO1    | Ala-Asp   | 140      | CM061795 | Marahatta Cancer Lett 236 276 2006                   |
| Oral cancer, association with                                     | Cancer  | *134660 | chr11 | 67109265  | +      | A       | R       | rs1695     | GSTP1    | Ile-Val   | 105      | CM990713 | Katoh Pharmacogenetics 9 165 1999                    |
| Lung cancer, susceptibility to, association with                  | Cancer  |         | chr12 | 54375624  | -      | C       | T       | rs1800974  | ITGA7    | Arg-His   | 651      | CM067685 | Rudd Genome Res 16 693 2006                          |
| Colorectal cancer, increased risk, association with               | Cancer  |         | chr17 | 3579585   | -      | G       | R       | rs1716     | ITGAE    | Arg-Tyr   | 950      | CM065287 | Webb Hum Mol Genet 15 3263 2006                      |
| Reduced risk of multiple myeloma, association                     | Cancer  | *601837 | chr13 | 107661610 | -      | G       | R       | rs1805389  | LIG4     | Gln-Trp   | 3        | CM023642 | Roddam J Med Genet 39 900 2002                       |
| Reduced risk of multiple myeloma, association                     | Cancer  | *601837 | chr13 | 107661592 | -      | G       | R       | rs1805388  | LIG4     | Thr-Ile   | 9        | CM023643 | Roddam J Med Genet 39 900 2002                       |
| Leukaemia, risk, association with ?                               | Cancer  |         | chr21 | 46529324  | +      | G       | R       | rs9975588  | MCM3AP   | Ser-Leu   | 102      | CM065300 | Rudd Blood 108 638 2006                              |
| Colorectal cancer, increased risk, association with               | Cancer  |         | chr18 | 28051919  | -      | C       | Y       | rs616114   | MEP1B    | Pro-Leu   | 695      | CM065309 | Webb Hum Mol Genet 15 3263 2006                      |
| Leukaemia, risk, association with                                 | Cancer  |         | chr20 | 44075813  | +      | G       | C       | rs2250889  | MMP9     | Arg-Pro   | 574      | CM064121 | Rudd Blood 108 638 2006                              |
| Lung cancer, susceptibility to, association with                  | Cancer  |         | chr11 | 59697175  | +      | T       | W       | rs7232     | MS4A6A   | Asn-Ile   | 150      | CM067701 | Rudd Genome Res 16 693 2006                          |
| Lung cancer, susceptibility, association with                     | Cancer  |         | chr3  | 9773773   | +      | C       | S       | rs1052133  | OGG1     | Ser-Cys   | 326      | CM993185 | Sugimura Cancer Epidemiol Biomarkers Prev 8 669 1999 |
| Lung cancer, susceptibility to, association with                  | Cancer  |         | chr17 | 8101874   | +      | C       | Y       | rs4791641  | PFAS     | Pro-Leu   | 367      | CM067707 | Rudd Genome Res 16 693 2006                          |
| Colorectal cancer, predisposition, association ?                  | Cancer  |         | chr17 | 4667435   | +      | C       | T       | rs1052748  | PLD2     | Thr-Ile   | 577      | CM030489 | Yamada J Mol Med 81 126 2003                         |
| Colorectal cancer, non-polyposis                                  | Cancer  |         | chr7  | 6012153   | +      | C       | Y       | rs10254120 | PMS2     | Arg-Gln   | 20       | CM941176 | Nicolaides Nature 371 75 1994                        |
| Leukaemia, risk, association with ?                               | Cancer  |         | chr2  | 170202109 | +      | A       | G       | rs8207     | PP1G     | Asn-Asp   | 699      | CM063067 | Rudd Blood 108 638 2006                              |
| Leukaemia, risk, association with                                 | Cancer  |         | chr8  | 53749259  | +      | A       | R       | rs17337252 | RB1CC1   | Met-Thr   | 234      | CM063091 | Rudd Blood 108 638 2006                              |
| Lung cancer, susceptibility to, association with                  | Cancer  |         | chr13 | 48948621  | +      | A       | G       | rs7998427  | SETDB2   | Glu-Gly   | 117      | CM067715 | Rudd Genome Res 16 693 2006                          |
| Neoplastic disease, increased risk, association                   | Cancer  |         | chr3  | 197285208 | -      | C       | Y       | rs3817672  | TFR3     | Gly-Ser   | 142      | CM991171 | Beckman Carcinogenesis 20 1231 1999                  |
| Colorectal cancer, increased risk, association with               | Cancer  |         | chr4  | 38476609  | -      | C       | S       | rs5743611  | TLR1     | Arg-Thr   | 80       | CM065490 | Webb Hum Mol Genet 15 3263 2006                      |
| Lung cancer, susceptibility to, association with                  | Cancer  |         | chr9  | 116843092 | -      | C       | Y       | rs2274750  | TNC      | Ala-Thr   | 1781     | CM067722 | Rudd Genome Res 16 693 2006                          |
| Microangiopathy in type 2 diabetes, association                   | Disease |         | chr6  | 32259421  | -      | C       | Y       | rs2070600  | AGER     | Gly-Ser   | 82       | CM994186 | Kankova Diabetes Care 22 1745 1999                   |
| Hyperoxaluria, association with                                   | Disease | #259900 | chr2  | 241466189 | +      | A       | R       | rs4426527  | AGXT     | Ile-Met   | 340      | CM910018 | Purdue J Cell Biol 111 2341 1990                     |
| Cardiac disease, susceptibility to, association                   | Disease |         | chr17 | 19753133  | -      | T       | Y       | rs203462   | AKAP10   | Ile-Val   | 646      | CM030773 | Kammerer Proc Natl Acad Sci U S A 100 4066 2003      |
| Arylsulphatase A pseudodeficiency, association                    | Disease | #250100 | chr22 | 49411282  | -      | T       | Y       | rs2071421  | ARSA     | Asn-Ser   | 350      | CM890013 | Gieselmann Proc Natl Acad Sci U S A 86 9436 1989     |
| Reduced risk of coronary artery disease, association              | Disease |         | chr5  | 78457715  | +      | G       | R       | rs3733890  | BHMT     | Arg-Gln   | 239      | CM031139 | Weisberg Atherosclerosis 167 205 2003                |
| Endometriosis, association with ?                                 | Disease |         | chr17 | 38497961  | -      | T       | Y       | rs16941    | BRCA1    | Glu-Gly   | 1038     | CM032861 | Goumenou Fertil Steril 79 445 2003                   |
| Asthma, association with                                          | Disease |         | chr17 | 29637007  | +      | G       | A       | rs1129844  | CCL11    | Ala-Thr   | 23       | CM072923 | Batra J Med Genet 44 397 2007                        |
| Multiple sclerosis, increased risk, association with              | Disease | #126200 | chr6  | 19613814  | -      | G       | R       | rs52812045 | CD24     | Ala-Val   | 57       | CM035761 | Zhou Proc Natl Acad Sci U S A 100 15041 2003         |
| Alzheimer disease, association with                               | Disease |         | chr11 | 1739170   | -      | G       | R       | rs17571    | CTSD     | Ala-Val   | 58       | CM000503 | Papassotiropoulos Neurosci Lett 262 171 1999         |
| Low renin hypertension, association with                          | Disease |         | chr8  | 143993541 | -      | T       | C       | rs4539     | CYP11B2  | Lys-Arg   | 173      | CM962423 | Fardella J Clin Endocrinol Metab 81 4347 1996        |
| Preeclampsia, association with ?                                  | Disease |         | chr1  | 224093029 | +      | A       | R       | rs2234922  | EPHX1    | His-Arg   | 139      | CM024366 | Laasanen Eur J Hum Genet 10 569 2002                 |
| Alzheimer disease, late-onset, association with                   | Disease |         | chr19 | 61385432  | -      | C       | S       | rs3745833  | GALP     | Ile-Met   | 72       | CM071786 | Grube Hum Mol Genet 16 865 2007                      |
| Coronary artery disease, association with                         | Disease |         | chr3  | 129687641 | -      | C       | Y       | rs2335052  | GATA2    | Ala-Thr   | 164      | CM066570 | Connelly PLoS Genet 2 e139 2006                      |
| Atherosclerosis, association with                                 | Disease |         | chr1  | 35033356  | +      | C       | Y       | rs1764391  | GJA4     | Pro-Ser   | 319      | CM994122 | Boerma J Intern Med 246 211 1999                     |
| Asthma, increased risk, association with ?                        | Disease |         | chr17 | 35375519  | -      | G       | R       | rs3894194  | GSDM1    | Arg-Gln   | 18       | CM073116 | Moffatt Nature 448 470 2007                          |
| Diabetes, type 1, association with                                | Disease | 610155* | chr2  | 162832297 | +      | C       | T       | rs1990760  | IFIH1    | Ala-Thr   | 946      | CM066881 | Smyth Nat Genet 38 617 2006                          |
| Sarcoidosis, increased risk, association with                     | Disease |         | chr9  | 21217622  | -      | A       | C       | rs9298814  | IFNA17   | Ile-Arg   | 184      | CM041015 | Akahoshi Hum Genet 114 503 2004                      |
| Psoriasis, increased risk, association with                       | Disease |         | chr1  | 67457975  | +      | T       | C       | rs7530511  | IL23R    | Leu-Pro   | 310      | CM073141 | Cargill Am J Hum Genet 80 273 2007                   |
| Atopy, association with                                           | Disease |         | chr16 | 27281681  | +      | T       | Y       | rs1805015  | IL4R     | Ser-Pro   | 503      | CM993667 | Kruse Immunology 96 365 1999                         |

Supplementary Table 2. nsSNPs cross-referenced to the Human Gene Mutation Database

| HGMD_Disease                                                              | Type      | OMIM    | chr   | position  | strand | ref-snp | obs-snp | rs_id      | HUGO_Sym  | AA_change | Prot_Pos | HGMD_ID  | Reference                                           |
|---------------------------------------------------------------------------|-----------|---------|-------|-----------|--------|---------|---------|------------|-----------|-----------|----------|----------|-----------------------------------------------------|
| Atopy, association with                                                   | Disease   |         | chr16 | 27281901  | +      | A       | R       | rs1801275  | IL4R      | Gln-Arg   | 576      | CM970783 | Hershey N Engl J Med 337 1720 1997                  |
| Nephropathy, reduced risk, association with                               | Disease   |         | chr3  | 187925712 | +      | T       | Y       | rs1656922  | KNG1      | Met-Thr   | 178      | CM065290 | Vionnet Diabetes 55 3166 2006                       |
| Neural tube defect, association with                                      | Disease   |         | chr14 | 63978598  | -      | G       | R       | rs2236225  | MTHFD1    | Arg-Gln   | 653      | CM022820 | Brody Am J Hum Genet 71 1207 2002                   |
| Cardiovascular disease and neural tube defects, association with          | Disease   | *607093 | chr1  | 11778965  | -      | G       | R       | rs1801133  | MTHFR     | Ala-Val   | 222      | CM950819 | Frosst Nat Genet 10 111 1995                        |
| Coronary artery disease in smokers, association                           | Disease   |         | chr1  | 235115123 | +      | A       | G       | rs1805087  | MTR       | Asp-Gly   | 919      | CM983303 | Wang J Cardiovasc Risk 5 289 1998                   |
| Alzheimer disease, late-onset, association with                           | Disease   |         | chr17 | 10164439  | +      | T       | Y       | rs2074877  | MTH13     | Met-Val   | 1071     | CM071869 | Grube Hum Mol Genet 16 865 2007                     |
| Congenital nephrotic syndrome, Finnish type                               | Disease   |         | chr19 | 41014441  | +      | T       | Y       | rs4806213  | NPHS1     | Asn-Ser   | 1077     | CM024138 | Gigante J Nephrol 15 696 2002                       |
| Minimal change nephrotic syndrome                                         | Disease   |         | chr19 | 41031849  | -      | G       | R       | .          | NPHS1     | Thr-Ile   | 294      | CM044680 | Lahdenkari Kidney Int 65 1856 2004                  |
| Stroke, increased risk, association with                                  | Disease   |         | chr1  | 11828655  | +      | A       | R       | rs5065     | NPPA      | STP-Arg   | 152      | CM040788 | Rubattu Stroke 35 814 2004                          |
| Glaucoma, open angle, association with                                    | Disease   |         | chr19 | 9829434   | -      | C       | T       | rs2303100  | OLF2      | Arg-Gln   | 106      | CM066940 | Funayama Invest Ophthalmol Vis Sci 47 5368 2006     |
| Acute myocardial infarction, association with                             | Disease   | 602601  | chr12 | 10204715  | +      | C       | S       | rs11053646 | OLR1      | Lys-Asn   | 167      | CM033655 | Tatsuguchi Biochem Biophys Res Commun 303 247 2003  |
| Non-syndromic hearing impairment                                          | Disease   | *606067 | chr20 | 16677048  | +      | T       | Y       | rs17686437 | OTOR      | Met-Thr   | 1        | CM010359 | Rendtorff Genomics 71 40 2001                       |
| Non-alcoholic fatty liver disease, association with                       | Disease   |         | chr17 | 17350285  | +      | C       | Y       | rs7946     | PEMT      | Val-Met   | 175      | CM054062 | Song FASEB J 19 1266 2005                           |
| Asthma and atopy, high IgE levels, association with                       | Disease   | +601690 | chr6  | 46787262  | -      | A       | R       | rs1805018  | PLA2G7    | Ile-Thr   | 198      | CM001308 | Kruse Am J Hum Genet 66 1522 2000                   |
| PAF acetylhydrolase deficiency                                            | Disease   | +601690 | chr6  | 46785057  | +      | C       | M       | rs16874954 | PLA2G7    | Val-Phe   | 279      | CM961468 | Stafforini J Clin Invest 97 2784 1996               |
| Hypertension, reduced risk, association with                              | Disease   |         | chr4  | 23424760  | -      | C       | Y       | rs8192678  | PPARGC1A  | Gly-Ser   | 482      | CM013959 | Ek Diabetologia 44 2220 2001                        |
| Familial haemophagocytic lymphohistiocytosis, susceptibility              | Disease   | *170280 | chr10 | 72030393  | +      | G       | R       | rs35947132 | PRF1      | Ala-Val   | 91       | CM022053 | Busiello Int J Immunogenet 33 123 2006              |
| Creutzfeldt-Jacob disease, Gerstmann-Straussler syndrome                  | Disease   | *137440 | chr20 | 4628251   | +      | A       | R       | rs1799990  | PRNP      | Met-Val   | 129      | CM890104 | Doh-Ura Biochem Biophys Res Commun 163 974 1989     |
| Cleft lip / palate, association with                                      | Disease   |         | chr11 | 119015854 | +      | A       | C       | rs7940667  | PVRL1     | Val-Gly   | 361      | CM066206 | Avila Am J Med Genet A 140 2562 2006                |
| Expression of allergic symptoms, association with                         | Disease   |         | chr14 | 20430056  | +      | C       | G       | rs2073342  | RNASE3    | Thr-Arg   | 124      | CM025442 | Jonsson Clin Exp Allergy 32 1092 2002               |
| Atopy, association with                                                   | Disease   |         | chr11 | 65491750  | -      | G       | S       | rs660118   | SART1     | Gly-Ala   | 485      | CM024558 | Wheatley Hum Mol Genet 11 2143 2002                 |
| Hypertension, reduced risk, association with                              | Disease   |         | chr12 | 6327323   | -      | T       | C       | rs2228576  | SCNN1A    | Thr-Ala   | 663      | CM994637 | Ambrosius Hypertension 34 631 1999                  |
| Diabetes, protection against, association with ?                          | Disease   |         | chr1  | 167943110 | -      | A       | R       | rs1131498  | SELL      | Phe-Leu   | 193      | CM004878 | Kretowski Immunol Lett 74 225 2000                  |
| Higher blood pressure in males, association with                          | Disease   |         | chr18 | 41516357  | -      | G       | R       | rs3745009  | SLC14A2   | Ala-Thr   | 880      | CM013794 | Ranade Hum Mol Genet 10 2157 2001                   |
| Atopy, maternally inherited, association with                             | Disease   |         | chr5  | 147460220 | +      | G       | R       | rs2303063  | SPINK5    | Ser-Asn   | 368      | CM013814 | Walley Nat Genet 29 175 2001                        |
| Preeclampsia                                                              | Disease   | #609404 | chr10 | 70315382  | +      | A       | M       | rs10509305 | STOX1     | Glu-Asp   | 608      | CM057372 | van Dijk Nat Genet 37 514 2005                      |
| Rheumatoid arthritis, juvenile, association with                          | Disease   |         | chr6  | 33380833  | -      | G       | C       | rs2071888  | TAPBP     | Thr-Arg   | 260      | CM056992 | Bukulmez Arthritis Res Ther 7 R285 2005             |
| Cleft lip, alveolus, and palate, association                              | Disease   |         | chr19 | 46539700  | -      | G       | R       | rs1800472  | TGFB1     | Thr-Ile   | 263      | CM044946 | Stoll BMC Med Genet 5 15 2004                       |
| Osteoporosis, association with                                            | Disease   |         | chr19 | 46550761  | -      | G       | A       | rs1800470  | TGFB1     | Pro-Leu   | 10       | CM002115 | Yamada J Bone Miner Res 13 1569 1998                |
| Familial premature coronary artery disease, association with              | Disease   |         | chr15 | 37669470  | +      | A       | R       | rs2228262  | THBS1     | Asn-Ser   | 700      | CM043345 | Hannah J Biol Chem 279 51915 2004                   |
| Paget disease, association with                                           | Disease   |         | chr8  | 120033233 | -      | G       | C       | rs2073618  | TNFRSF11B | Asn-Lys   | 3        | CM045665 | Daroszewska J Bone Miner Res 19 1506 2004           |
| Systemic lupus erythematosus susceptibility, association with             | Disease   |         | chr19 | 10336652  | +      | C       | M       | rs2304256  | TYK2      | Val-Phe   | 362      | CM050351 | Sigurdsson Am J Hum Genet 76 528 2005               |
| Thromboembolic disease, myocardial infarction, association with           | Disease   |         | chr8  | 31144196  | +      | T       | Y       | rs1346044  | WRN       | Cys-Arg   | 1367     | CM971591 | Ye Am J Med Genet 68 494 1997                       |
| Skin lesions in pseudoxanthoma elasticum (PXE), association with          | Disease   |         | chr17 | 45792455  | +      | C       | Y       | rs6504649  | XYLT2     | Thr-Arg   | 801      | CM064361 | Schon J Med Genet 43 745 2006                       |
| Stargardt disease                                                         | M_Disease | #248200 | chr1  | 94341263  | -      | T       | Y       | .          | ABCA4     | Ile-Val   | 156      | CM003569 | Papaianou Invest Ophthalmol Vis Sci 41 16 2000      |
| Stargardt disease                                                         | M_Disease | #248200 | chr1  | 94316822  | -      | T       | C       | rs3112831  | ABCA4     | His-Arg   | 423      | CM015072 | Webster Invest Ophthalmol Vis Sci 42 1179 2001      |
| Pseudoxanthoma elasticum, autosomal recessive                             | M_Disease | #177850 | chr16 | 16159100  | -      | C       | Y       | rs2238472  | ABCC6     | Arg-Gln   | 1268     | CM001044 | Ringpfeil Proc Natl Acad Sci U S A 97 6001 2000     |
| Adrenoleukodystrophy                                                      | M_Disease | #300100 | chrX  | 152661677 | .      | G       | R       | .          | ABCD1     | Gly-Asp   | 608      | CM012040 | Dvorakova Hum Mutat 18 52 2001                      |
| Adenosine deaminase deficiency                                            | M_Disease | #102700 | chr20 | 42688634  | -      | T       | Y       | rs11555566 | ADA       | Lys-Arg   | 80       | CM860001 | Valerio EMBO J 5 113 1986                           |
| Metachromatic leukodystrophy                                              | M_Disease | #250100 | chr22 | 49410905  | +      | G       | S       | rs743616   | ARSA      | Thr-Ser   | 391      | CM910052 | Polten N Engl J Med 324 18 1991                     |
| Mucopolysaccharidosis VI                                                  | M_Disease | #253200 | chr5  | 78170997  | +      | C       | Y       | rs25414    | ARSB      | Ser-Asn   | 384      | CM003999 | Voskoboeva Russ J Genet 36 689 2000                 |
| Progressive hearing loss, autosomal recessive                             | M_Disease | #610220 | chr2  | 179033981 | +      | C       | S       | rs17304212 | DFNB59    | Arg-Gly   | 265      | CM074142 | Hashemzadeh Cholestori Clin Genet 72 261 2007       |
| Mitochondrial neurogastrointestinal encephalopathy                        | M_Disease | #603041 | chr22 | 49311121  | -      | C       | Y       | .          | ECGF1     | Ala-Thr   | 465      | CM030064 | Kocaefe Eur J Hum Genet 11 102 2003                 |
| Cockayne syndrome                                                         | M_Disease | #133540 | chr10 | 50348375  | -      | T       | Y       | rs2228527  | ERCC6     | Arg-Gly   | 1213     | CM980633 | Mallery Am J Hum Genet 62 77 1998                   |
| Protoporphyrria, erythropoietic                                           | M_Disease | #177000 | chr18 | 53398334  | +      | C       | M       | rs3848519  | FECH      | Gly-Cys   | 55       | CM910155 | Lamoril Biochem Biophys Res Commun 181 594 1991     |
| Gangliosidosis GM1                                                        | M_Disease | #230500 | chr3  | 33113553  | +      | G       | A       | rs7637099  | GLB1      | Pro-Leu   | 10       | CM055955 | Gururaj J Child Neurol 20 57 2005                   |
| Spinal muscular atrophy with resp. distress 1                             | M_Disease | #604320 | chr11 | 68462250  | +      | C       | A       | rs17612126 | IGHMBP2   | Thr-Lys   | 879      | CM055288 | Tachi Pediatr Neurol 32 288 2005                    |
| Multiple epiphyseal dysplasia (MED), modifier                             | M_Disease | #607078 | chr2  | 20069022  | -      | C       | Y       | rs52826764 | MATN3     | Glu-Lys   | 252      | CM040093 | Jackson J Med Genet 41 52 2004                      |
| Myoclonic epilepsy of Lafora                                              | M_Disease | #254780 | chr6  | 18230485  | +      | G       | A       | rs10949483 | NHLRC1    | Pro-Leu   | 111      | CM065338 | Franceschetti Epilepsia 47 640 2006                 |
| Refsum disease                                                            | M_Disease | #266500 | chr10 | 13380242  | -      | G       | R       | rs28938169 | PHYH      | Pro-Ser   | 29       | CM001290 | Jansen Hum Mol Genet 9 1195 2000                    |
| Cone-rod dystrophy                                                        | M_Disease | #608194 | chr14 | 20859880  | +      | G       | K       | rs61722408 | RPGRIP1   | Ala-Ser   | 547      | CM032029 | Hameed J Med Genet 40 616 2003                      |
| Charcot-Marie-Tooth disease 4C                                            | M_Disease | #601596 | chr5  | 148386628 | -      | G       | R       | .          | SH3TC2    | Arg-STP   | 954      | CM033084 | Senderek Am J Hum Genet 73 1106 2003                |
| Achondrogenesis 1B                                                        | M_Disease | #600972 | chr5  | 149341414 | +      | A       | W       | rs3776070  | SLC26A2   | Thr-Ser   | 689      | CM980573 | Cai Am J Med Genet 78 58 1998                       |
| Peeling skin syndrome                                                     | M_Disease | #609796 | chr15 | 41339641  | .      | C       | M       | .          | TGM5      | Gly-Cys   | 113      | CM054150 | Cassidy Am J Hum Genet 77 909 2005                  |
| Deafness, childhood onset                                                 | M_Disease | #601072 | chr21 | 42682161  | +      | C       | Y       | rs45598239 | TMPRSS3   | Ala-Thr   | 90       | CM054156 | Hutchin Clin Genet 68 506 2005                      |
| Reduced serum noncholesterol sterols, association with                    | Met Trait |         | chr2  | 43952937  | +      | C       | M       | rs4148217  | ABCG8     | Thr-Lys   | 400      | CM042913 | Berge J Lipid Res 43 486 2002                       |
| Lower activity, association with                                          | Met Trait |         | chr16 | 3973437   | -      | T       | Y       | rs2230739  | ADCY9     | Ile-Met   | 772      | CM034003 | Small Pharmacogenetics 13 535 2003                  |
| Hyperoxaluria, intermediary metabolic enzyme                              | Met Trait |         | chr2  | 241456987 | +      | C       | Y       | rs34116584 | AGXT      | Pro-Leu   | 11       | CM910014 | Purdue J Cell Biol 111 2341 1990                    |
| Elevated plasma fibrinogen levels, association with                       | Met Trait |         | chr14 | 24113511  | +      | T       | Y       | rs45567233 | CTSG      | Asn-Ser   | 125      | CM015243 | Herrmann Arterioscler Thromb Vasc Biol 21 1538 2001 |
| Insulin resistance, association with                                      | Met Trait |         | chr6  | 132214061 | +      | A       | M       | rs1044498  | ENPP1     | Lys-Gln   | 121      | CM993455 | Pizzuti Diabetes 48 1881 1999                       |
| N-acetylglucosamine binding, association with                             | Met Trait |         | chr9  | 136918847 | +      | C       | Y       | rs57863140 | FCN2      | Thr-Met   | 236      | CM051922 | Hummelshoj Hum Mol Genet 14 1651 2005               |
| Trimethylaminuria, mild                                                   | Met Trait | #602079 | chr1  | 169343590 | +      | G       | R       | rs2266782  | FMO3      | Glu-Lys   | 158      | CM992884 | Akerman Mol Genet Metab 68 24 1999                  |
| Elevated leptin levels, association with, glucose tolerance               | Met Trait |         | chr1  | 65809029  | +      | A       | R       | rs1137100  | LLEPR     | Lys-Arg   | 109      | CM032948 | van Rossum Obes Res 11 377 2003                     |
| Mannose-binding protein deficiency, association                           | Met Trait |         | chr10 | 54201248  | -      | G       | R       | rs5030737  | MBL2      | Arg-Cys   | 52       | CM960957 | Madsen Immunogenetics 40 37 1994                    |
| Decreased enzyme activity and benzene toxicity, association with          | Met Trait |         | chr16 | 68302646  | -      | G       | R       | rs1800566  | NQO1      | Pro-Ser   | 187      | CM950861 | Rosvold Pharmacogenetics 5 199 1995                 |
| Plasma total cholesterol, apolipoprotein B, and lipoprotein levels, assoc | Met Trait |         | chr1  | 55301775  | +      | G       | R       | rs505151   | PSK9      | Gly-Glu   | 670      | CM051950 | Chen J Am Coll Cardiol 45 1611 2005                 |
| Hypertriglyceridaemia, association with                                   | Met Trait | *603937 | chr8  | 55701948  | +      | A       | W       | rs2293869  | RP1       | Asn-Tyr   | 985      | CM035763 | Fujita J Hum Genet 48 305 2003                      |
| Non-inhibitory variant                                                    | Met Trait |         | chr18 | 59538313  | +      | T       | W       | rs1506419  | SERPIN11  | Trp-Arg   | 188      | CM074500 | Askew J Biol Chem 282 24948 2007                    |

Supplementary Table 2. nsSNPs cross-referenced to the Human Gene Mutation Database

| HGMD_Disease                                                   | Type        | OMIM    | chr   | position  | strand | ref-snp | obs-snp | rs_id      | HUGO_Sym  | AA_change | Prot_Pos | HGMD_ID  | Reference                                           |
|----------------------------------------------------------------|-------------|---------|-------|-----------|--------|---------|---------|------------|-----------|-----------|----------|----------|-----------------------------------------------------|
| Non-inhibitory variant                                         | Met Trait   |         | chr18 | 59541341  | +      | T       | Y       | rs1395267  | SERPINB11 | Ser-Pro   | 303      | CM074499 | Askew J Biol Chem 282 24948 2007                    |
| Increased folate levels, association with                      | Met Trait   |         | chr17 | 18172821  | +      | G       | R       | rs1979277  | SHMT1     | Leu-Phe   | 474      | CM014391 | Heil Mol Genet Metab 73 164 2001                    |
| Reduced function, association with                             | Met Trait   |         | chr6  | 160463138 | +      | C       | Y       | rs12208357 | SLC22A1   | Arg-Cys   | 61       | CM072040 | Shu Proc Natl Acad Sci U S A 100 5902 2003          |
| Reduced serum myo-inositol concentration, association          | Met Trait   |         | chr16 | 24796147  | +      | T       | Y       | rs11074656 | SLC5A11   | Val-Ala   | 182      | CM044067 | Groenen Mol Genet Metab 82 154 2004                 |
| Cholestasis, drug-induced, association with                    | Pharm Trait |         | chr2  | 169538574 | -      | A       | G       | rs2287622  | ABCB11    | Val-Ala   | 444      | CM071525 | Lang Pharmacogenet Genomics 17 47 2007              |
| Gain of function, association with                             | Pharm Trait |         | chr10 | 115795046 | +      | G       | C       | rs1801253  | ADRB1     | Gly-Arg   | 389      | CM994344 | Mason J Biol Chem 274 12670 1999                    |
| ara-C resistance, association with                             | Pharm Trait | *123920 | chr1  | 20788288  | +      | A       | M       | rs2072671  | CDA       | Lys-Gln   | 27       | CM984152 | Kirch Exp Hematol 26 421 1998                       |
| Poor paclitaxel metabolism, association with                   | Pharm Trait |         | chr10 | 96817020  | -      | C       | Y       | rs11572080 | CYP2C8    | Arg-Lys   | 139      | CM014700 | Soyama Biol Pharm Bull 24 1427 2001                 |
| Poor paclitaxel metabolism, association with                   | Pharm Trait |         | chr10 | 96788739  | +      | T       | Y       | rs10509681 | CYP2C8    | Lys-Arg   | 399      | CM014701 | Soyama Biol Pharm Bull 24 1427 2001                 |
| Poor metaboliser of sulfonylurea, warfarin sensitivity         | Pharm Trait | *601130 | chr10 | 96731043  | +      | A       | M       | rs1057910  | CYP2C9    | Ile-Leu   | 359      | CM960481 | Sullivan Pharmacogenetics 6 341 1996                |
| Poor metaboliser, warfarin sensitivity                         | Pharm Trait | *601130 | chr10 | 96692037  | +      | C       | T       | rs1799853  | CYP2C9    | Arg-Cys   | 144      | CM994193 | Aynacioglu Br J Clin Pharmacol 48 409 1999          |
| FMO2 variant                                                   | Pharm Trait |         | chr1  | 169435169 | +      | T       | Y       | rs2307492  | FMO2      | Phe-Ser   | 182      | CM033899 | Furnes Drug Metab Dispos 31 187 2003                |
| Slow acetylation                                               | Pharm Trait | #243400 | chr8  | 18302134  | +      | T       | C       | rs1801280  | NAT2      | Ile-Thr   | 114      | CM910269 | Vatsis Proc Natl Acad Sci U S A 88 6333 1991        |
| POR deficiency                                                 | Pharm Trait |         | chr7  | 75452942  | +      | C       | Y       | rs1057868  | POR       | Ala-Val   | 500      | CM057356 | Miller Ann N Y Acad Sci 1061 100 2005               |
| Thiopurine S-Methyltransferase deficiency                      | Pharm Trait | #610460 | chr6  | 18251934  | -      | C       | S       | rs1800462  | TPMT      | Ala-Pro   | 80       | CM951239 | Krynetski Proc Natl Acad Sci U S A 92 949 1995      |
| Decreased enzyme activity                                      | Pharm Trait |         | chr2  | 234302542 | -      | T       | C       | rs3821242  | UGT1A3    | Trp-Arg   | 11       | CM042128 | Iwai J Hum Genet 49 123 2004                        |
| Reduced catalytic activity, association with                   | Pharm Trait |         | chr2  | 234255944 | +      | T       | C       | rs11692021 | UGT1A7    | Trp-Arg   | 208      | CM004345 | Guillemette Pharmacogenetics 10 629 2000            |
| Reduced catalytic activity, association with                   | Pharm Trait |         | chr2  | 234255709 | +      | T       | G       | rs17868323 | UGT1A7    | Asn-Lys   | 129      | CM024576 | Gemignani Pharmacogenetics 12 459 2002              |
| Blood group variation                                          | Trait       | #111200 | chr19 | 50014584  | +      | A       | R       | rs1135062  | BCAM      | Thr-Ala   | 539      | CM973377 | Parsons Blood 89 4219 1997                          |
| Gov platelet antigen variation                                 | Trait       |         | chr6  | 74550153  | +      | A       | C       | rs10455097 | CD109     | Tyr-Ser   | 703      | CM020385 | Schuh Blood 99 1692 2002                            |
| Menstrual cycle, length, association with                      | Trait       |         | chr2  | 49043425  | -      | C       | T       | rs6166     | FSHR      | Ser-Asn   | 680      | CM052876 | Greb J Clin Endocrinol Metab 90 4866 2005           |
| Apoptosis, unable to induce, association with                  | Trait       |         | chr14 | 24171429  | -      | G       | S       | rs11539752 | GZMB      | Pro-Ala   | 94       | CM033776 | Mclroy Proc Natl Acad Sci U S A 100 2562 2003       |
| Apoptosis, unable to induce, association with                  | Trait       |         | chr14 | 24170122  | +      | A       | R       | rs2236338  | GZMB      | Tyr-His   | 247      | CM033777 | Mclroy Proc Natl Acad Sci U S A 100 2562 2003       |
| Decreased total IgE level, association with                    | Trait       |         | chr16 | 27281373  | +      | A       | M       | rs1805011  | IL4R      | Glu-Ala   | 400      | CM993665 | Hackstein Hum Immunol 60 1119 1999                  |
| Increased BMI and levels of soluble receptor, association with | Trait       |         | chr1  | 152693594 | +      | A       | C       | rs2228145  | IL6R      | Asp-Ala   | 358      | CM034737 | Wolford Mol Genet Metab 80 338 2003                 |
| Dyslexia susceptibility, association with                      | Trait       | 600202% | chr6  | 24696863  | +      | C       | Y       | rs4504469  | KIAA0319  | Ala-Thr   | 311      | CM057333 | Cope Am J Hum Genet 76 581 2005                     |
| Higher body mass index, association with                       | Trait       |         | chr1  | 65831101  | +      | A       | G       | rs1137101  | LEPR      | Gln-Arg   | 223      | CM010905 | Quinton Hum Genet 108 233 2001                      |
| Exfoliation glaucoma syndrome increased risk, association with | Trait       | *153456 | chr15 | 72006599  | +      | G       | T       | rs1048661  | LOXL1     | Arg-Leu   | 141      | CM074329 | Thorleifsson Science 317 1397 2007                  |
| Lumbar spine bone-mineral content, association with            | Trait       |         | chr11 | 67957871  | +      | C       | T       | rs3736228  | LRP5      | Ala-Val   | 1330     | CM067428 | van Meurs J Bone Miner Res 21 141 2006              |
| Red hair, association with                                     | Trait       |         | chr16 | 88513592  | +      | G       | R       | rs11547464 | MC1R      | Arg-His   | 142      | CM994355 | Schioth Biochem Biophys Res Commun 260 488 1999     |
| Cardiac hypertrophy, protection, association                   | Trait       |         | chr14 | 23908923  | +      | G       | C       | rs2229309  | NFATC4    | Gly-Ala   | 160      | CM032294 | Poirier Eur J Hum Genet 11 659 2003                 |
| Darker eye colour, association with                            | Trait       | *611409 | chr15 | 25903913  | -      | C       | Y       | rs1800407  | OCA2      | Arg-Gln   | 419      | CM025432 | Rebeck Cancer Epidemiol Biomarkers Prev 11 782 2002 |
| Skin/hair/eye pigmentation variation, association              | Trait       | #227240 | chr5  | 33999627  | +      | C       | Y       | rs26722    | SLC45A2   | Glu-Lys   | 272      | CM051555 | Graf Hum Mutat 25 278 2005                          |
| Mycobacterium tuberculosis, susceptibility to                  | Trait       | #607948 | chr2  | 230758959 | -      | A       | G       | rs3948464  | SP110     | Leu-Ser   | 425      | CM066604 | Tosh Proc Natl Acad Sci U S A 103 10364 2006        |
| Phenylthiocarbamide taste sensitivity                          | Trait       | #171200 | chr7  | 141319814 | -      | C       | G       | rs713598   | TAS2R38   | Ala-Pro   | 49       | CM031368 | Kim Science 299 1221 2003                           |
| Phenylthiocarbamide taste sensitivity                          | Trait       | #171200 | chr7  | 141319073 | +      | T       | C       | rs10246939 | TAS2R38   | Ile-Val   | 296      | CM031370 | Kim Science 299 1221 2003                           |
| Altered activity, association with                             | Trait       |         | chr4  | 187241068 | -      | C       | Y       | rs3775291  | TLR3      | Leu-Phe   | 412      | CM073380 | Ranjith-Kumar J Biol Chem 282 17696 2007            |
| Legionnaires disease susceptibility, SLE resistance            | Trait       | #608556 | chr1  | 221351823 | -      | G       | R       | rs5744168  | TLR5      | Arg-STP   | 392      | CM034621 | Hawn J Exp Med 198 1563 2003                        |

**Supplementary Table 3. Neuropathy associated genes.**

| Gene            | Other Name      | Chr   | CytoBand       | Start       | End         | All SNPs          | cSNPs          |             |
|-----------------|-----------------|-------|----------------|-------------|-------------|-------------------|----------------|-------------|
| <i>NGF</i>      | <i>NGFB</i>     | chr1  | 1p13.1         | 115,828,537 | 115,880,857 | 59                | 1              |             |
| <i>YARS</i>     | -               | chr1  | 1p35.1         | 33,240,840  | 33,283,633  | 24                | 0              |             |
| <i>KIF1B</i>    | -               | chr1  | 1p36.2         | 10,270,764  | 10,441,661  | 17                | 0              |             |
| <i>MFN2</i>     | -               | chr1  | 1p36.22        | 12,040,238  | 12,073,572  | 52                | 0              |             |
| <i>PLEKHG5</i>  | -               | chr1  | 1p36.31        | 6,526,152   | 6,580,069   | 93                | 5              |             |
| <i>LMNA</i>     | -               | chr1  | 1q21.2-q21.3   | 156,084,461 | 156,109,878 | 6                 | 0              |             |
| <i>NTRK1</i>    | -               | chr1  | 1q21-q22       | 156,785,542 | 156,851,642 | 68                | 1              |             |
| <i>MPZ</i>      | -               | chr1  | 1q23.3         | 161,274,525 | 161,279,762 | 3                 | 0              |             |
| <i>DCTN1</i>    | -               | chr2  | 2p13           | 74,588,282  | 74,607,475  | 2                 | 0              |             |
| <i>RAB7A</i>    | <i>RAB7</i>     | chr3  | 3q21.3         | 128,444,979 | 128,533,641 | 75                | 0              |             |
| <i>SH3TC2</i>   | <i>KIAA1985</i> | chr5  | 5q32           | 148,361,713 | 148,442,737 | 71                | 3              |             |
| <i>FIG4</i>     | <i>SAC3</i>     | chr6  | 6q21           | 110,012,424 | 110,146,634 | 0                 | 0              |             |
| <i>GARS</i>     | -               | chr7  | 7p15           | 30,634,181  | 30,673,649  | 39                | 3              |             |
| <i>HSPB1</i>    | <i>HSP27</i>    | chr7  | 7q11.23        | 75,931,875  | 75,933,614  | 8                 | 0              |             |
| <i>NEFL</i>     | <i>NFL</i>      | chr8  | 8p21           | 24,808,468  | 24,814,131  | 12                | 0              |             |
| <i>ARHGEF10</i> | -               | chr8  | 8p23           | 1,772,149   | 1,906,807   | 228               | 4              |             |
| <i>GDAP1</i>    | -               | chr8  | 8q21.11        | 75,262,618  | 75,279,345  | 30                | 1              |             |
| <i>NDRG1</i>    | -               | chr8  | 8q24.3         | 134,249,414 | 134,309,547 | 96                | 1              |             |
| <i>SPTLC1</i>   | <i>SPT1</i>     | chr9  | 9q22.2         | 94,793,427  | 94,877,690  | 10                | 1              |             |
| <i>IKBKAP</i>   | -               | chr9  | 9q31           | 111,629,800 | 111,696,608 | 60                | 1              |             |
| <i>SETX</i>     | -               | chr9  | 9q34.13        | 135,136,827 | 135,230,372 | 111               | 6              |             |
| <i>EGR2</i>     | -               | chr10 | 10q21.1        | 64,571,757  | 64,578,927  | 4                 | 1              |             |
| <i>SBF2</i>     | <i>MTMR13</i>   | chr11 | 11p15.4        | 9,800,214   | 10,315,754  | 859               | 2              |             |
| <i>BSCL2</i>    | <i>SEIPIN</i>   | chr11 | 11q12-q13.5    | 62,457,747  | 62,477,046  | 20                | 1              |             |
| <i>IGHMBP2</i>  | -               | chr11 | 11q13.3        | 68,671,319  | 68,708,069  | 34                | 3              |             |
| <i>MTMR2</i>    | -               | chr11 | 11q22          | 95,566,044  | 95,657,371  | 128               | 2              |             |
| <i>FGD4</i>     | -               | chr12 | 12p11.21       | 32,655,041  | 32,798,984  | 20                | 1              |             |
| <i>HSN2</i>     | <i>HSAN2</i>    | chr12 | 12p13.3        | 976,870     | 978,799     | 2                 | 0              |             |
| <i>HSPB8</i>    | <i>HSP22</i>    | chr12 | 12q24.23       | 119,616,595 | 119,632,551 | 13                | 0              |             |
| <i>SLC12A6</i>  | -               | chr15 | 15q13-q15      | 34,522,197  | 34,630,265  | 277               | 3              |             |
| <i>LITAF</i>    | <i>SIMPLE</i>   | chr16 | 16p13.13       | 11,641,578  | 11,681,322  | 75                | 1              |             |
| <i>GAN</i>      | -               | chr16 | 16q24.1        | 81,348,571  | 81,413,803  | 77                | 1              |             |
| <i>PMP22</i>    | -               | chr17 | 17p12-p11.2    | 15,133,096  | 15,168,644  | 6                 | 0              |             |
| <i>SEPT9</i>    | -               | chr17 | 17q25          | 75,277,492  | 75,496,678  | 308               | 2              |             |
| <i>CTDP1</i>    | -               | chr18 | 18q23          | 77,439,801  | 77,514,507  | 143               | 3              |             |
| <i>DNM2</i>     | -               | chr19 | 19p13.2        | 10,828,755  | 10,942,579  | 82                | 0              |             |
| <i>PRX</i>      | -               | chr19 | 19q13.13-q13.2 | 40,899,671  | 40,919,271  | 19                | 6              |             |
| <i>SOX10</i>    | -               | chr22 | 22q13.1        | 38,368,319  | 38,380,539  | 5                 | 1              |             |
| <i>GJB1</i>     | <i>CX32</i>     | chrX  | Xq13.1         | 70,435,062  | 70,445,065  | 6                 | 0              |             |
| <i>PRPS1</i>    | -               | chrX  | Xq21.32-q24    | 106,871,654 | 106,894,256 | 6                 | 0              |             |
|                 |                 |       |                |             |             | <b>Total SNPs</b> | 3,148          | 54          |
|                 |                 |       |                |             |             | <b>Known SNPs</b> | 2,682 (85.19%) | 45 (83.33%) |
|                 |                 |       |                |             |             | <b>Novel SNPs</b> | 466 (14.8%)    | 9 (16.66%)  |
